# Supplementary material for: Dispersion Performances of Naphthalimides Doped in Dual Temperature- and pH-Sensitive Poly (N-Isopropylacrylamide-co-acrylic Acid) Shell Assembled with Vinyl-Modified Mesoporous SiO2 Core for Fluorescence Cell Imaging
Source: MDPI journal article supplement (doi:10.3390/polym15102339), 2023-05-17
Supplement: s1 [file s1]

**Dispersion performances of naphthalimides doped in dual temperature- and pH-sensitive poly (N-isopropylacrylamide-co-acrylic acid) shell assembled with vinyl-modified mesoporous SiO<sub>2</sub> core for fluorescence cell imaging**

Xiaohuan Xu, Xiaoli Wang, Xueqing Cui, Bingying Jia, Bang Xu\*, Jihong Sun\*

Beijing Key Laboratory for Green Catalysis and Separation, Department of Chemical Engineering, Beijing University of Technology, Beijing 100124, China

**Electronic Supplementary Information**

**Figure S1.** Regression equation and HPLC standard curve of IBU concentration in absolute ethanol.

**Figure S2.** Regression equations and the standard curves of IBU concentration in PBS at (A) pH 2.0 and (B) pH 7.4.

**Figure S3.** Small angle XRD patterns (insert: wide angel) (A) of before and after IBU loading samples, (a) PAN@BMMs-II-0.1, (b) PAN@BMMs-mix-0.1, (c) I/PAN@BMMs-II-0.1, and (d) I/PAN@BMMs-mix-0.1. N<sub>2</sub> adsorption-desorption isotherms (right: the offset values were remarked in the Y-axis; insert: pore size distribution) (B) of (a) BMMs, (b) M-BMMs, (c) PAN@BMMs-I-0.05, (d) PAN@BMMs-I-0.1, (e) PAN@BMMs-I-1, (f) I/PAN@BMMs-I-0.05, (g) I/PAN@BMMs-I-0.1, (h) I/PAN@BMMs-I-1, and (C) of (a) PAN@BMMs-II-0.1, (b) PAN@BMMs-mix-0.1, (c) I/PAN@BMMs-II-0.1, (d) I/PAN@BMMs-mix-0.1.

**Figure S4.** FT-IR spectra (A) (a) BMMs, (b) M-BMMs, (c) P(NIPAM-co-AA), (d) AN, (e) PAN@BMMs-I-0.1, (f) I/PAN@BMMs-I-0.1, and (g) IBU. At the region of 2000-400 cm<sup>-1</sup> (B) (a) PAN@BMMs-I-0.05, (b) PAN@BMMs-I-1, (c) PAN@BMMs-II-0.1, and (d) PAN@BMMs-mix-0.1.

**Figure S5.** XPS survey spectra (A), N1s spectra (B), and C1s spectra (C) of (a)

P(NIPAM-co-AA)@BMMs and (b) PAN@BMMs-I-0.1.

**Figure S6.** Fluorescence emission spectra of AN ( $2 \times 10^{-3}$  mol/L) in various solvents, (a) PE, (b) 1,4-Dioxane, (c) EtOH, (d) MeCN, and (e) DMSO.

**Figure S7.** TGA curves of (a) BMMs, (b) M-BMMs, (c) P(NIPAM-co-AA), (d) PAN@BMMs-I-0.05, (e) PAN@BMMs-I-0.1, (f) PAN@BMMs-I-1, (g) PAN@BMMs-II-0.1, (h) PAN@BMMs-mix-0.1, and (i) AN.

**Figure S8.** Size distribution of BMMs nanomaterial.

**Figure S9.** Swelling time-depended fluorescent spectra of (A) PAN@BMMs-I-0.05, (B) PAN@BMMs-I-0.1, (C) PAN@BMMs-I-1, (D) PAN@BMMs-II-0.1, and (E) PAN@BMMs-mix-0.1, at (a) pH 7.4 25 °C and (b) pH 2.0 37 °C, Notes: S represents the solid sample and L is the filtrated solution.

**Figure S10.** Ln-Ln plots originating from the SAXS patterns of PAN@BMMs-I-0.05 (A) in pH 7.4 at 25 °C and (B) in pH 2.0 at 37 °C over time, PAN@BMMs-I-1 (C) in pH 7.4 at 25 °C and (D) in pH 2.0 at 37 °C over time. Their corresponding  $P(r)$ - $r$  charts were inserted. (a) 1 h, (b) 3 h, (c) 8 h, (d) 12 h, (e) 24 h. Notes: The linear ranges with a higher coefficient ( $R^2 > 0.99$ ) were  $-2.20 < \ln q < -1.52$ . The vertical offset values were presented in the right Y-axis

**Figure S11.** Fluorescent spectra of (A) I/PAN@BMMs-I-0.05, (B) I/PAN@BMMs-I-0.1, (C) I/PAN@BMMs-I-1, (D) I/PAN@BMMs-II-0.1, (E) I/PAN@BMMs-mix-0.1 during the IBU release process (a) in pH 2.0 at 37 °C and (b) in pH 7.4 at 25 °C. Notes: S represents the solid sample and L is the filtrated solution.

**Figure S12.** Time-dependent CLSM images (6 h, 12 h, 24 h) of HeLa cells incubated as controlled samples, scale bars were 10  $\mu$ m.

**Table S1.** The fluorescence decay data of all related samples.

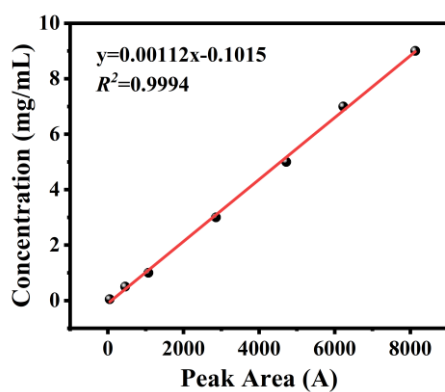

**Figure S1.** Regression equation and HPLC standard curve of IBU concentration in absolute ethanol.

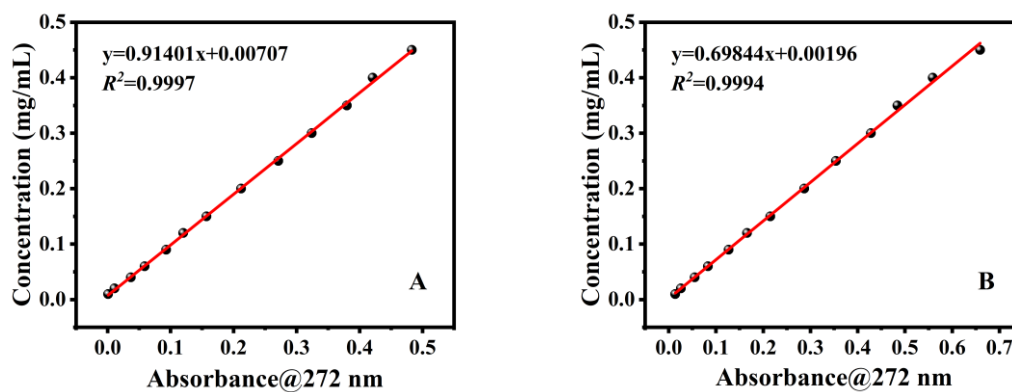

**Figure S2.** Regression equations and the standard curves of IBU concentration in PBS at (A) pH 2.0 and (B) pH 7.4.

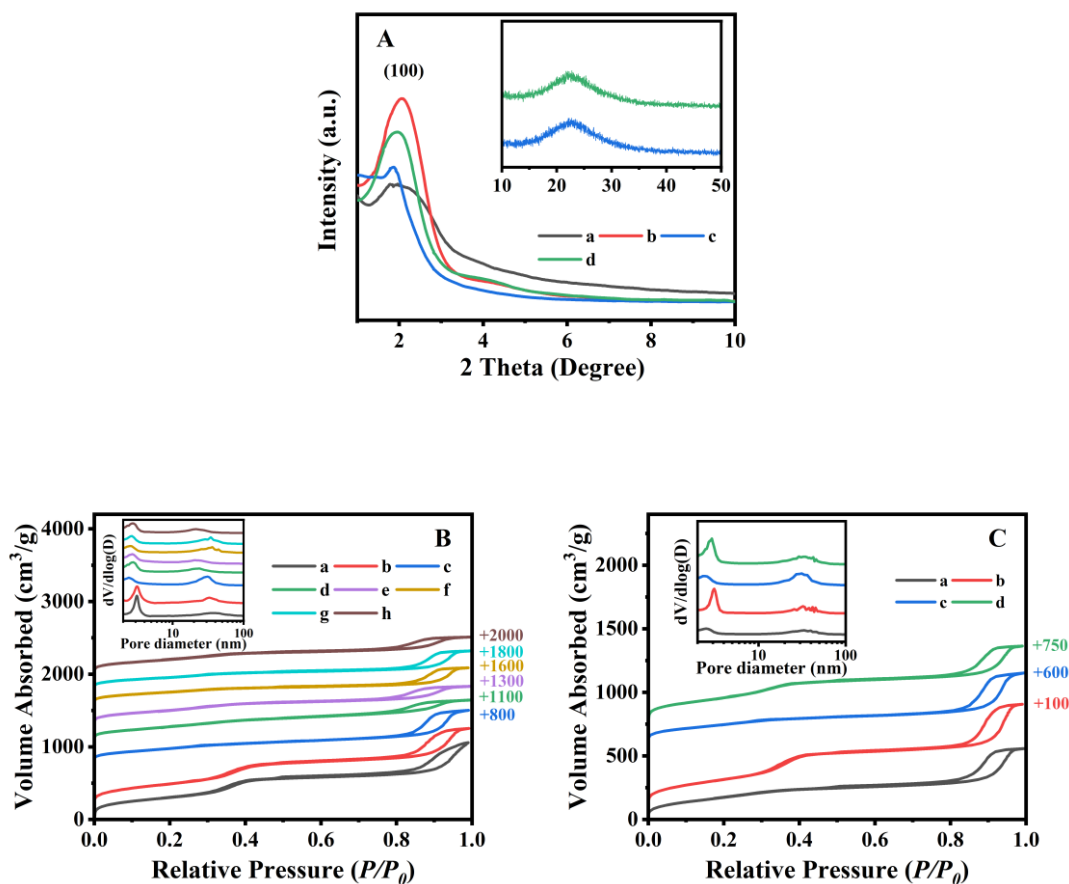

**Figure S3.** Small angle XRD patterns (insert: wide angel) (A) of before and after IBU loading samples, (a) PAN@BMMs-II-0.1, (b) PAN@BMMs-mix-0.1, (c) I/PAN@BMMs-II-0.1, and (d) I/PAN@BMMs-mix-0.1. N<sub>2</sub> adsorption-desorption isotherms (right: the offset values were remarked in the Y-axis; insert: pore size distribution) (B) of (a) BMMs, (b) M-BMMs, (c) PAN@BMMs-I-0.05, (d) PAN@BMMs-I-0.1, (e) PAN@BMMs-I-1, (f) I/PAN@BMMs-I-0.05, (g) I/PAN@BMMs-I-0.1, (h) I/PAN@BMMs-I-1, and (C) of (a) PAN@BMMs-II-0.1, (b) PAN@BMMs-mix-0.1, (c) I/PAN@BMMs-II-0.1, (d) I/PAN@BMMs-mix-0.1.

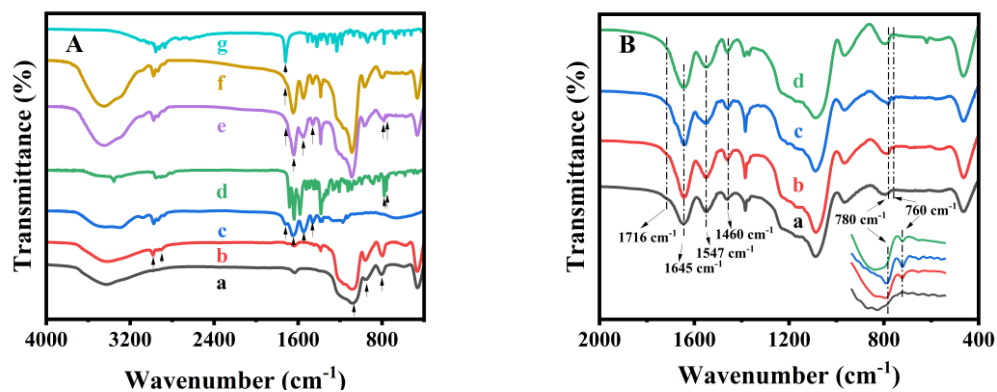

**Figure S4.** FT-IR spectra (A) (a) BMMs, (b) M-BMMs, (c) P(NIPAM-co-AA), (d) AN, (e) PAN@BMMs-I-0.1, (f) I/PAN@BMMs-I-0.1, and (g) IBU. At the region of 2000-400  $\text{cm}^{-1}$  (B) (a) PAN@BMMs-I-0.05, (b) PAN@BMMs-I-1, (c) PAN@BMMs-II-0.1, and (d) PAN@BMMs-mix-0.1.

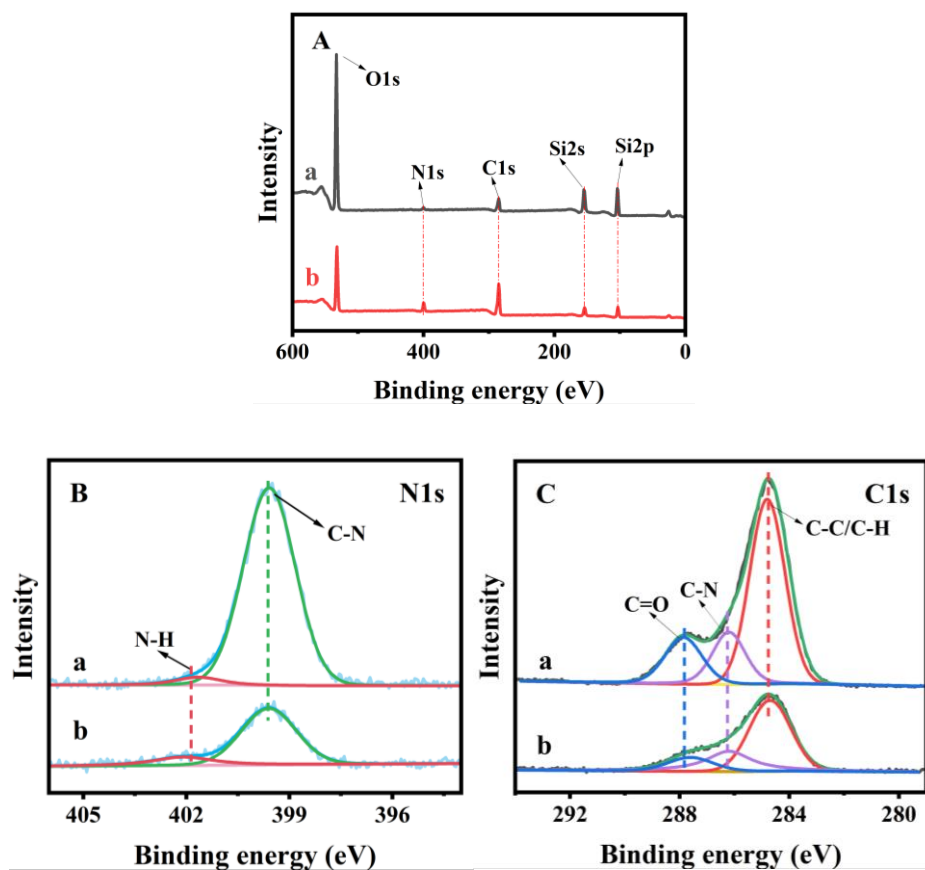

**Figure S5.** XPS survey spectra (A), N1s spectra (B), and C1s spectra (C) of (a) P(NIPAM-co-AA)@BMMs and (b) PAN@BMMs-I-0.1.

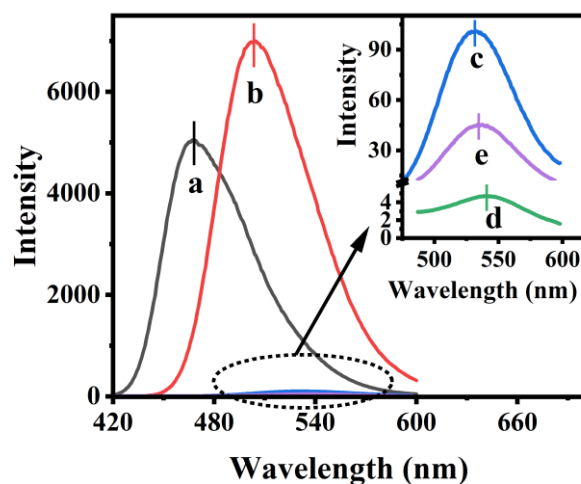

**Figure S6.** Fluorescence emission spectra of AN ( $2 \times 10^{-3}$  mol/L) in various solvents, (a) PE, (b) 1,4-Dioxane, (c) EtOH, (d) MeCN, and (e) DMSO.

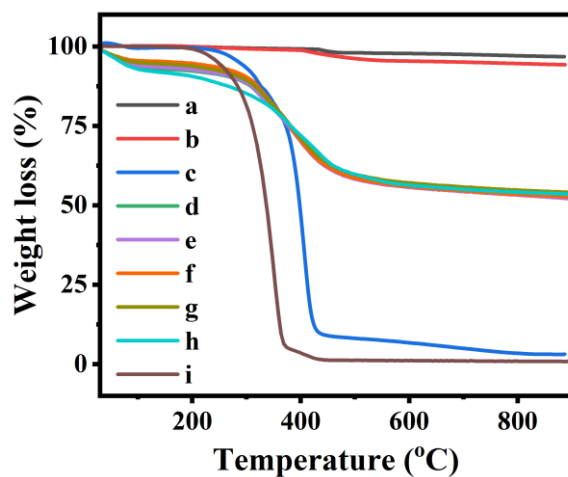

**Figure S7.** TGA curves of (a) BMMs, (b) M-BMMs, (c) P(NIPAM-co-AA), (d) PAN@BMMs-I-0.05, (e) PAN@BMMs-I-0.1, (f) PAN@BMMs-I-1, (g) PAN@BMMs-II-0.1, (h) PAN@BMMs-mix-0.1, and (i) AN.

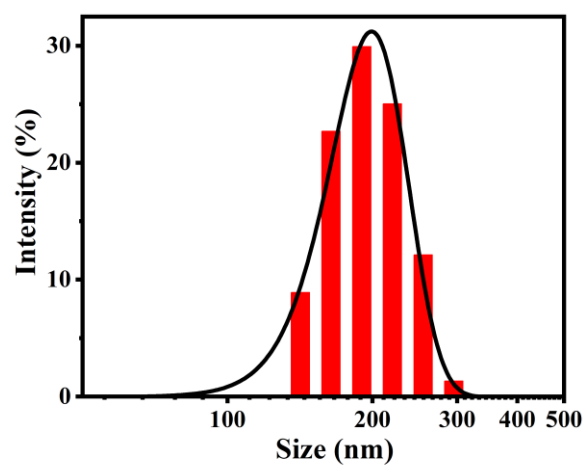

**Figure S8.** Particle size distribution of the synthesized BMMs.



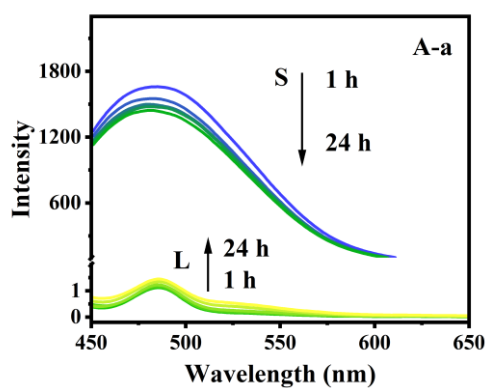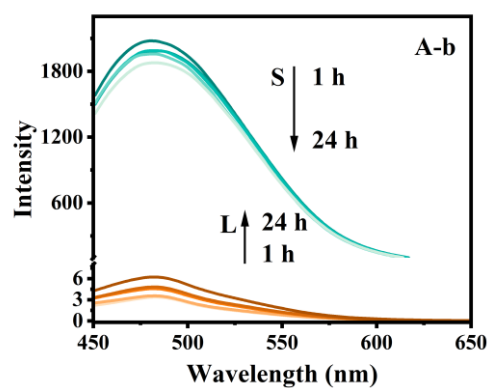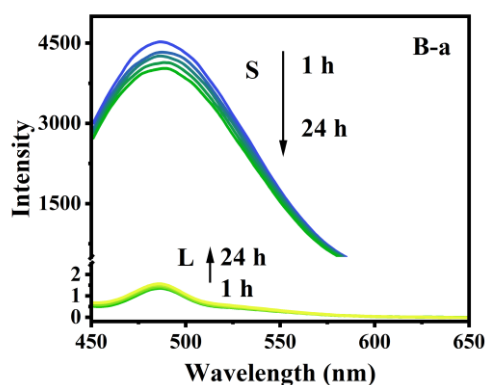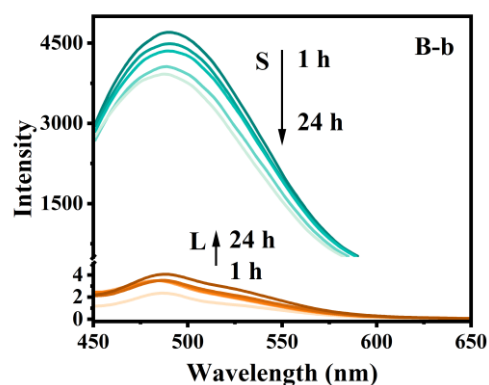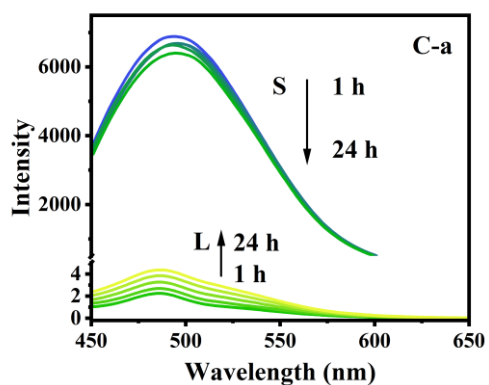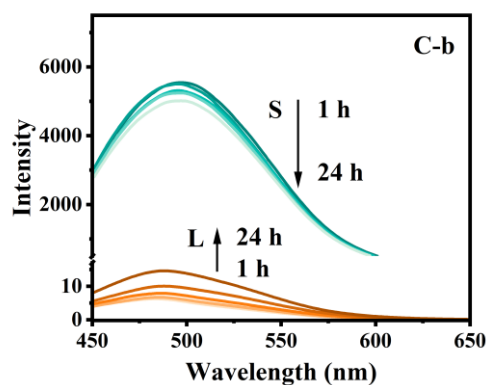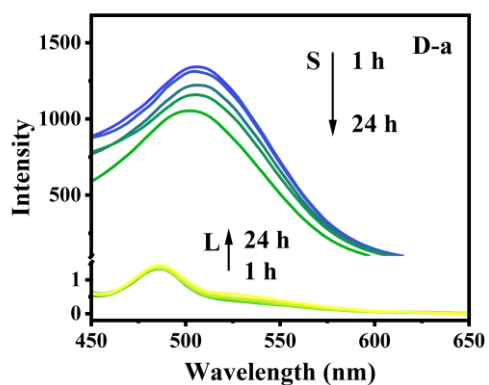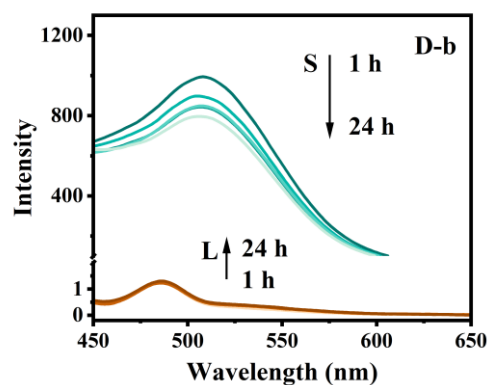

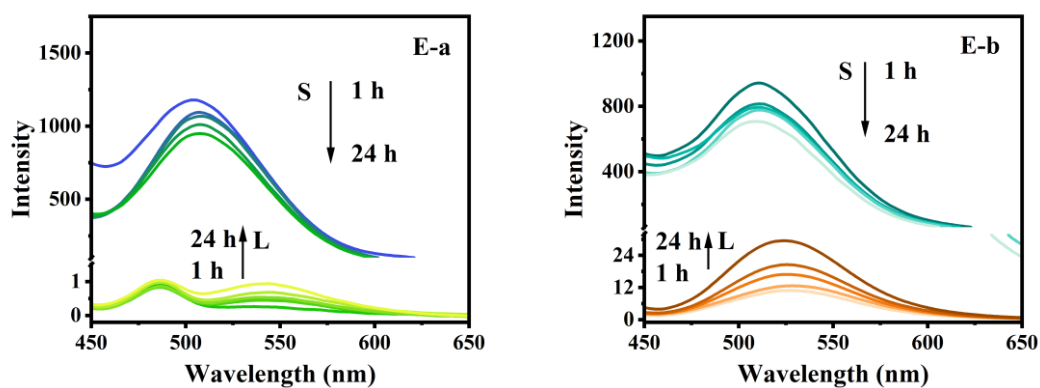

**Figure S9.** Swelling time-dependent fluorescent spectra of (A) PAN@BMMs-I-0.05, (B) PAN@BMMs-I-0.1, (C) PAN@BMMs-I-1, (D) PAN@BMMs-II-0.1, and (E) PAN@BMMs-mix-0.1, at (a) pH 7.4 25 °C and (b) pH 2.0 37 °C, Notes: S represents the solid sample and L is the filtrated solution.

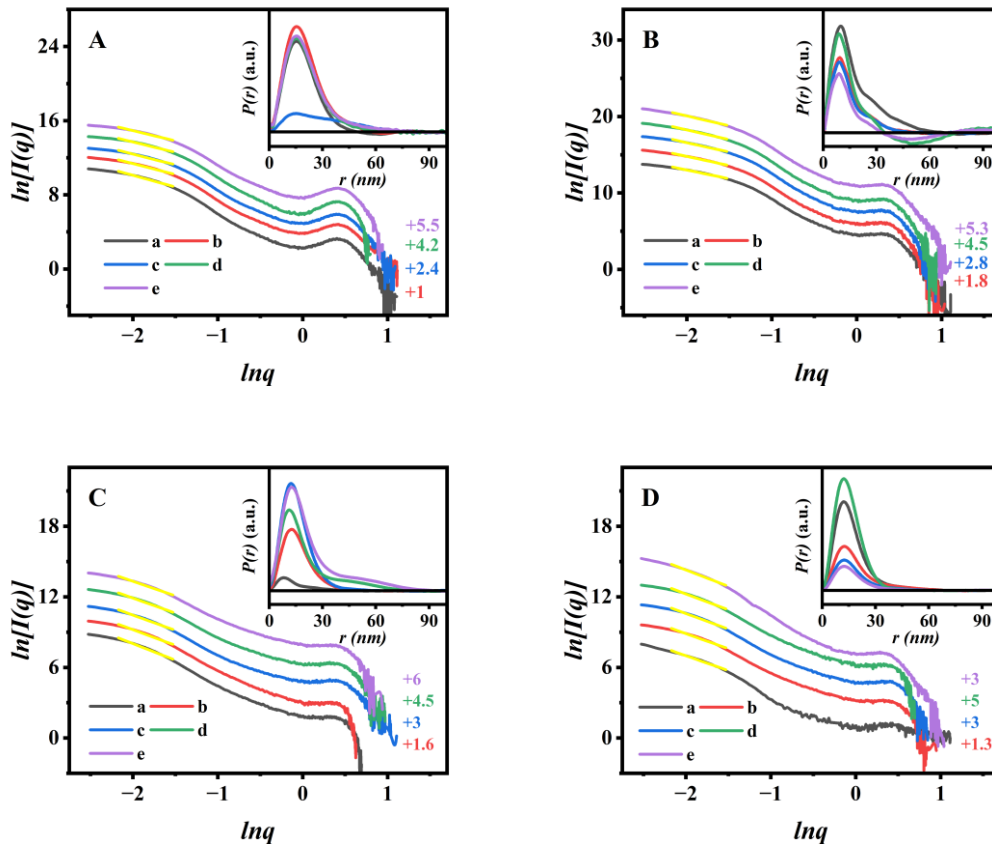

**Figure S10.** Ln-Ln plots originating from the SAXS patterns of PAN@BMMs-I-0.05 (A) in pH 7.4 at 25 °C and (B) in pH 2.0 at 37 °C over time, PAN@BMMs-I-1 (C) in pH 7.4 at 25 °C and (D) in pH 2.0 at 37 °C over time. Their corresponding  $P(r)$ - $r$  charts were inserted. (a) 1 h, (b) 3 h, (c) 8 h, (d) 12 h, (e) 24 h. Notes: The linear ranges with a higher coefficient ( $R^2 > 0.99$ ) were  $-2.20 < \ln q < -1.52$ . The vertical offset values were presented in the right Y-axis.

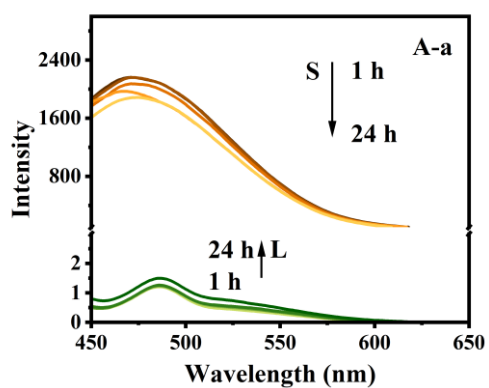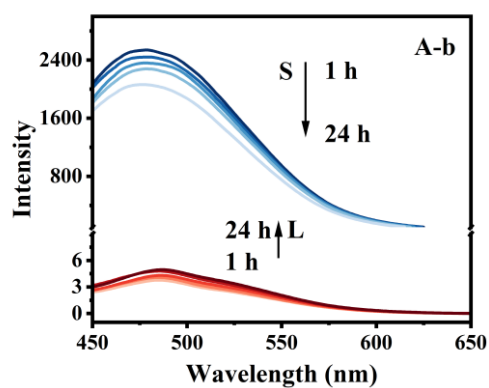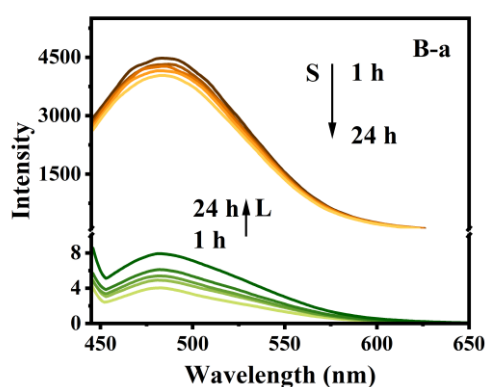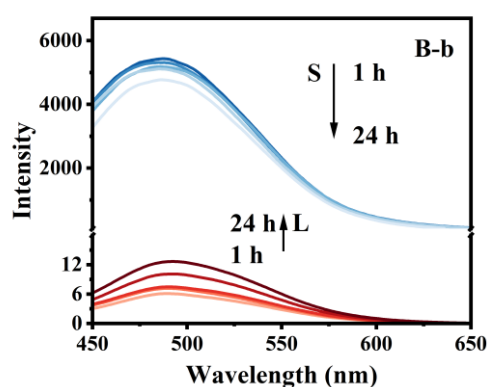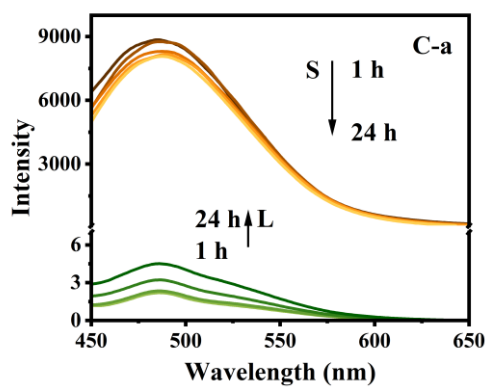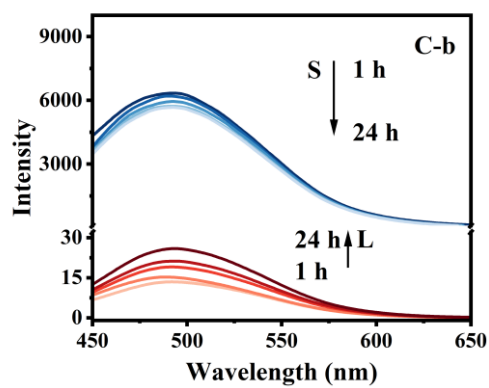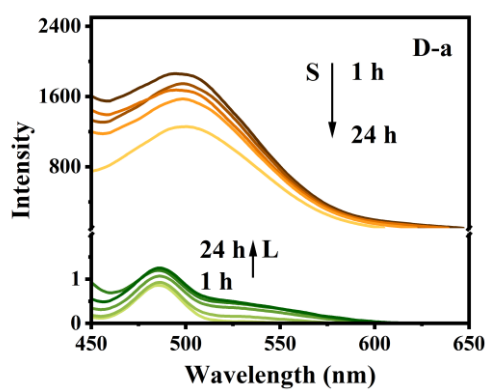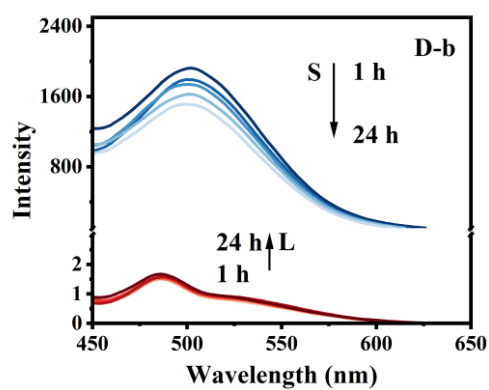

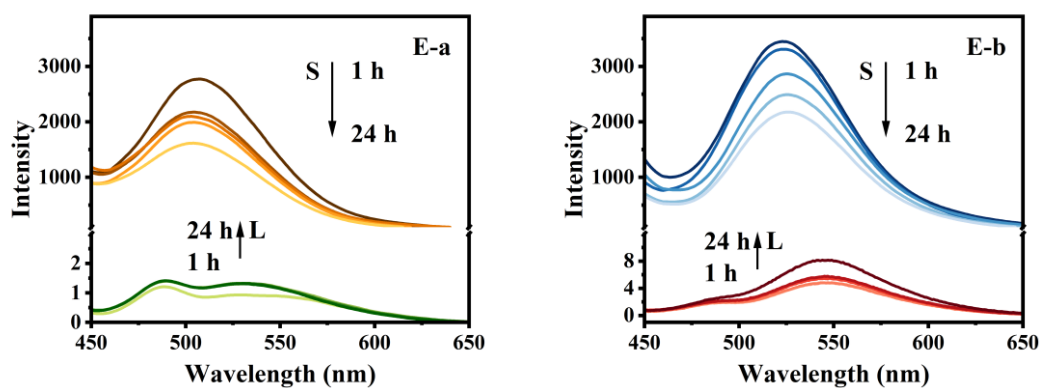

**Figure S11.** Fluorescent spectra of (A) I/PAN@BMMs-I-0.05, (B) I/PAN@BMMs-I-0.1, (C) I/PAN@BMMs-I-1, (D) I/PAN@BMMs-II-0.1, (E) I/PAN@BMMs-mix-0.1 during the IBU release process (a) in pH 2.0 at 37 °C and (b) in pH 7.4 at 25 °C. Notes: S represents the solid sample and L is the filtrated solution.

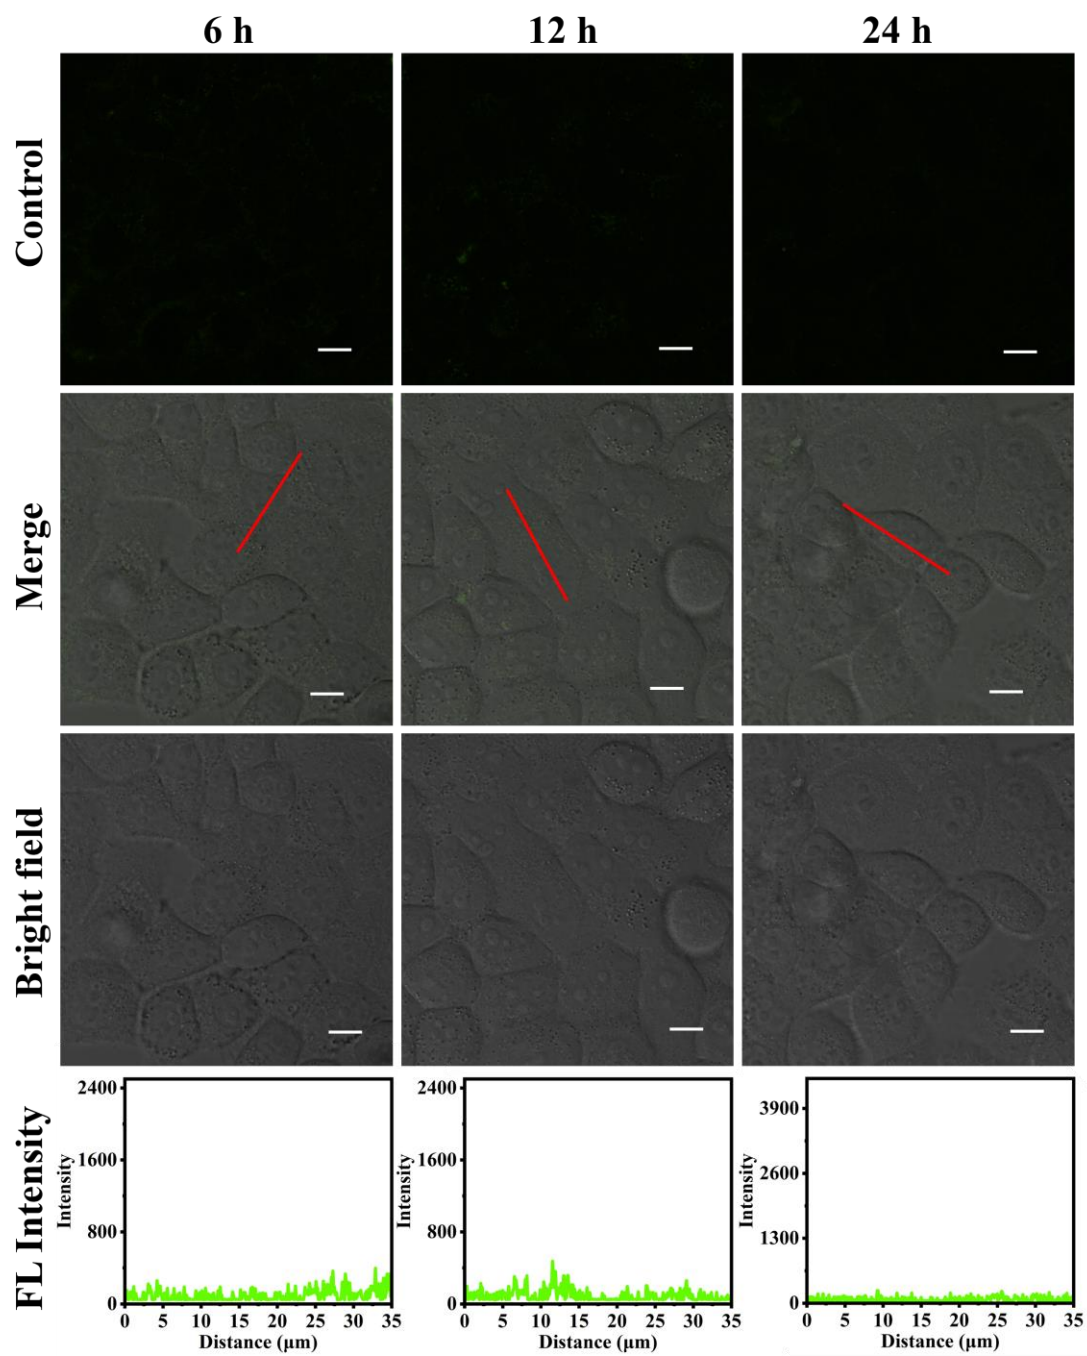

**Figure S12.** Time-dependent CLSM images (6 h, 12 h, 24 h) of HeLa cells incubated as the controlled samples, scale bars were 10  $\mu\text{m}$ .

**Table S1.** The fluorescence decay data of all related samples

| Samples          | fluorecsence lifetime/ns |       |                          |       | $\chi^2$ | A      |
|------------------|--------------------------|-------|--------------------------|-------|----------|--------|
|                  | $\tau_1$ /ns ( $B_1$ /%) |       | $\tau_2$ /ns ( $B_2$ /%) |       |          |        |
| AN               | 3.78                     | 40.74 | 12.27                    | 59.26 | 1.0860   | 1.1802 |
| PNA@BMMs-I-0.05  | 3.35                     | 39.77 | 10.50                    | 60.23 | 1.0613   | 1.4684 |
| PNA@BMMs-I-0.1   | 3.59                     | 40.52 | 10.62                    | 59.48 | 1.0550   | 1.6255 |
| PNA@BMMs-I-1     | 3.89                     | 36.17 | 10.92                    | 63.83 | 1.0566   | 1.6804 |
| PNA@BMMs-II-0.1  | 2.64                     | 40.04 | 8.56                     | 59.96 | 1.0433   | 1.3830 |
| PNA@BMMs-mix-0.1 | 3.53                     | 24.12 | 9.00                     | 75.88 | 1.0787   | 2.9830 |
